# Supplementary material for: Suicide and self-harm in low- and middle- income countries during the COVID-19 pandemic: A systematic review
Source: bioRxiv or medRxiv preprint supplement (doi:10.1101/2021.09.03.21263083), 2021-09-07
Supplement: Supplementary file [file media-1.pdf]

## Supplementary material

### Summary of quality assessment criteria for reasonable quality studies

| Study design     | Assessment tool | Questions from the overall scale number | Criteria to be met                                                                                                                    |
|------------------|-----------------|-----------------------------------------|---------------------------------------------------------------------------------------------------------------------------------------|
| Cohort study     | JBI             | 1                                       | Two groups were similar and recruited from the same population                                                                        |
|                  |                 | 2                                       | Exposures were measured similarly to assign exposure status                                                                           |
|                  |                 | 6                                       | Were strategies to deal with confounding factors stated                                                                               |
|                  |                 | 7                                       | Suicidal behaviour was measured in a valid and reliable way                                                                           |
|                  |                 | 9                                       | Follow-up was complete or reasons for loss to follow up were described and explored                                                   |
| Before and After | NIH tool        | 3                                       | All eligible participants that met the prespecified entry criteria were enrolled                                                      |
|                  |                 | 6                                       | Outcome measures were prespecified, clearly defined, valid, reliable, and assessed consistently across all study participants         |
|                  |                 | 7                                       | The same approach/data source was used for the pre-covid measures of suicidal behaviour as those collected during the pandemic period |
|                  |                 | 8                                       | There were no differences in level of missing data pre and during the pandemic period                                                 |
| Time series      | EPOC RoB Tool   | 1                                       | Intervention independent of other changes                                                                                             |
|                  |                 | 2                                       | Intervention unlikely to affect data collection (low or unclear risk)                                                                 |
|                  |                 | 5                                       | Missing outcome measures were unlikely to bias the results                                                                            |
| Cross sectional  | JBI             | 1                                       | Criteria for inclusion was clearly defined                                                                                            |
|                  |                 | 2                                       | Study participants and setting were described in detail                                                                               |
|                  |                 | 6                                       | Were strategies to deal with confounding factors stated                                                                               |
|                  |                 | 7                                       | Suicidal behaviour was measured in a valid and reliable way                                                                           |
| Case series      | JBI             | 1                                       | Criteria for inclusion was clearly defined                                                                                            |
|                  |                 | 3                                       | Valid methods were used for identification of the condition for all participants included in the case series                          |
|                  |                 | 4                                       | Consecutive cases were included                                                                                                       |
|                  |                 | 6                                       | Clear reporting of demographics of the participants in the study                                                                      |

JBI – Joanna Briggs Institute; NIH – National Institutes of Health; EPOC – (Cochrane) Effective Practice and Organisation of Care; RoB – risk of bias

**Number of cases of suicide and self-harm used to calculate rate ratios**

| Author (year)     | Number of cases* by pandemic period |        |
|-------------------|-------------------------------------|--------|
|                   | Pre-                                | During |
| Thongchuam (2021) | 1                                   | 7      |
| Fidanci (2021)    | 187                                 | 31     |
| Eray (2021)       | 23                                  | 11     |
| Acharya (2020)    | 9                                   | 4      |
| Sengupta (2020)   | 33                                  | 50     |
| Behara (2021)     | 105                                 | 61     |
| Jhanwar (2020)    | 3                                   | 11     |
| Shrestha (2020)   | 38                                  | 55     |

\* Cases were either suicide deaths or self-harm attempts
